# Supplementary material
Source: Springer Nature journal article supplement (https://www.springermedizin.de/resource/supplementary/13000_2014_1116_MOESM3_ESM.pdf/9625884)

**A**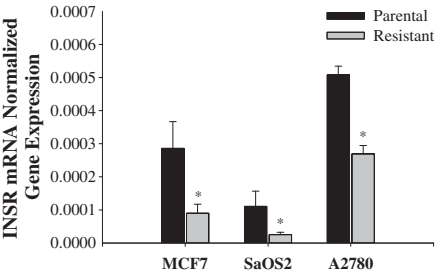**B**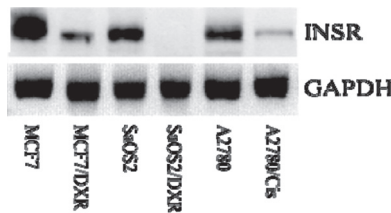**C**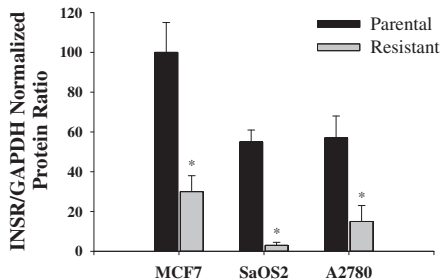

Supplement: MOESM3 [file 9625884]
